# Supplementary material for: Triple bond-modified anthracene sensitizers for dye-sensitized solar cells: a computational study
Source: Royal Society of Chemistry journal article supplement (doi:10.1039/c5ra04408a), 2015-01-01

**Table S1** Excitation energies ( $E_{\text{ex}}$ ), oscillator strengths ( $f$ ), and transition compositions in  $\text{CH}_2\text{Cl}_2$  solution, obtained by applying TD-CAM-B3LYP/6-31G(d,p) using C-PCM model.

| Dyes       | State                 | $E_{\text{ex}}$ , eV (nm) | $f$    | Transition composition                                                                                                     |
|------------|-----------------------|---------------------------|--------|----------------------------------------------------------------------------------------------------------------------------|
| <b>An1</b> | $S_0 \rightarrow S_1$ | 3.31 (374)                | 0.8596 | (+0.62) H-1 $\rightarrow$ L+1<br>(-0.21) H-2 $\rightarrow$ L+1                                                             |
|            | $S_0 \rightarrow S_3$ | 3.74 (331)                | 0.6376 | (+0.66) H-5 $\rightarrow$ L<br>(-0.18) H-1 $\rightarrow$ L+1                                                               |
|            | $S_0 \rightarrow S_7$ | 4.25 (292)                | 0.5290 | (+0.53) H $\rightarrow$ L<br>(+0.24) H-1 $\rightarrow$ L+3<br>(-0.21) H-2 $\rightarrow$ L+3<br>(+0.19) H $\rightarrow$ L+4 |
| <b>An2</b> | $S_0 \rightarrow S_1$ | 2.75 (450)                | 1.6038 | (+0.63) H $\rightarrow$ L+1<br>(+ 0.22) H-1 $\rightarrow$ L+1                                                              |
|            | $S_0 \rightarrow S_4$ | 3.74 (331)                | 1.0348 | (+0.64) H-5 $\rightarrow$ L<br>(-0.17) H-2 $\rightarrow$ L+1                                                               |
| <b>An3</b> | $S_0 \rightarrow S_1$ | 2.53 (490)                | 1.6325 | (+0.51) H-1 $\rightarrow$ L<br>(-0.40) H $\rightarrow$ L                                                                   |
|            | $S_0 \rightarrow S_8$ | 4.24 (292)                | 0.8582 | (+0.42) H $\rightarrow$ L+3<br>(+0.35) H-2 $\rightarrow$ L+3                                                               |
| <b>An4</b> | $S_0 \rightarrow S_1$ | 2.21 (562)                | 2.2861 | (+0.64) H $\rightarrow$ L<br>(-0.17) H $\rightarrow$ L+1                                                                   |
|            | $S_0 \rightarrow S_4$ | 3.67 (337)                | 0.6031 | (+0.53) H-5 $\rightarrow$ L<br>(+0.27) H-5 $\rightarrow$ L<br>(+0.23) H $\rightarrow$ L+1                                  |

NOTE: H = HOMMO, H-1 = HOMO-1, H-2 = HOMO-2, ...  
 L = LUMO, L+1 = LUMO+1, L+2 = LUMO+2, ...

**Figure S1** Schematic energy diagram of the free dyes, bare  $\text{TiO}_2$  and dye@ $\text{TiO}_2$  system at the optimized structures by Dmol<sup>3</sup>.

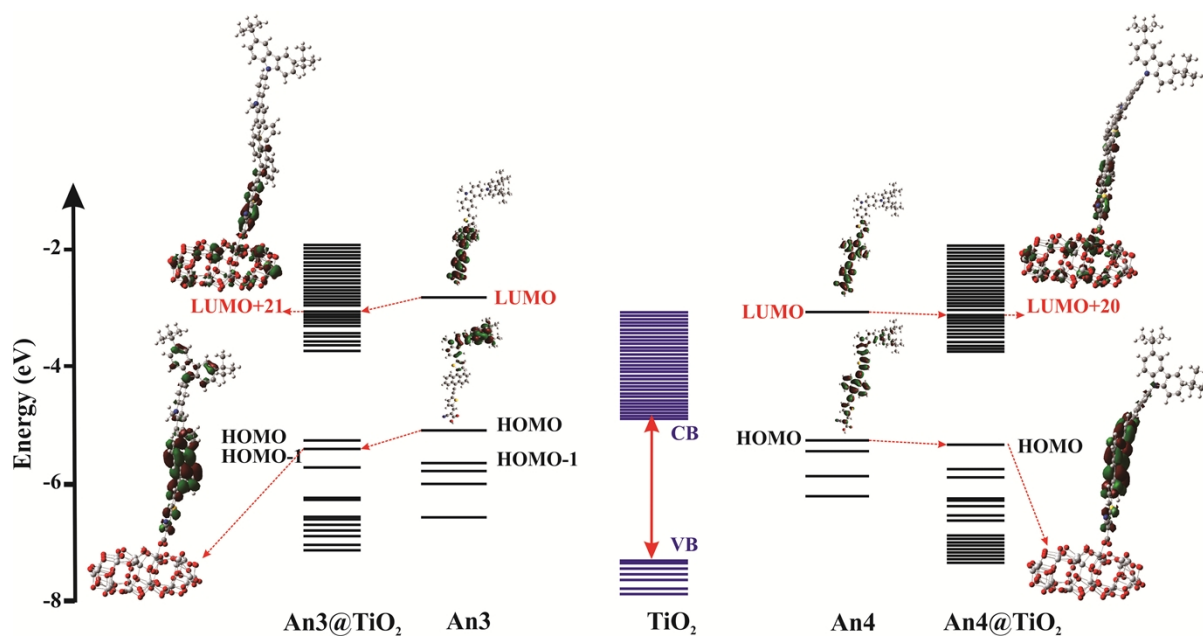

Supplement: c5ra04408a1.pdf [file c5ra04408a1.pdf]
